# Supplementary material for: Sulfonated carbons from agro-industrial residues: simple and efficient catalysts for the Biginelli reaction
Source: Royal Society of Chemistry journal article supplement (doi:10.1039/d1nj04686a), 2022-01-01
Supplement: d1nj04686a1.pdf [file d1nj04686a1.pdf]

## Electronic Supplementary Information

### **Sulfonated carbons from agro-industrial residues: simple and efficient catalysts for the Biginelli reaction**

**Letícia Gomes do Nascimento,<sup>a</sup> Isabela Milhomem Dias,<sup>a</sup> Guilherme Botelho Meireles de Souza,<sup>a,b</sup> Lucas Clementino Mourão,<sup>a</sup> Mariana Bisinotto Pereira,<sup>a,b</sup> Júlio César Vieira Viana,<sup>a,c</sup> Luciano Morais Lião,<sup>a</sup> Guilherme Roberto de Oliveira,<sup>a</sup> Christian Gonçalves Alonso.<sup>a,1</sup>**

<sup>a</sup> *Institute of Chemistry, Federal University of Goiás, CEP 74690-900 Goiânia, Goiás, Brazil.*

<sup>b</sup> *Chemical Engineering Department, State University of Maringá, CEP 87020-900 Maringá, Paraná, Brazil*

<sup>c</sup> *Federal University of Tocantins, CEP 77404-970, Gurupi, Tocantins, Brazil.*

---

<sup>1</sup> Corresponding author. E-mail: christian@ufg.br

## Table of Contents

|                                                            |     |
|------------------------------------------------------------|-----|
| 1. SEM/EDX analysis.....                                   | S3  |
| 2. TEM images .....                                        | S4  |
| 3. XRD analysis.....                                       | S5  |
| 4. Pore size distributions.....                            | S6  |
| 5. Elementary composition by XPS analysis.....             | S7  |
| 6. NMR spectra.....                                        | S8  |
| 7. TEM images and SEM/EDX patterns of reused catalyst..... | S17 |
| 8. Test of catalyst reuse .....                            | S18 |

# 1. SEM/EDX analysis

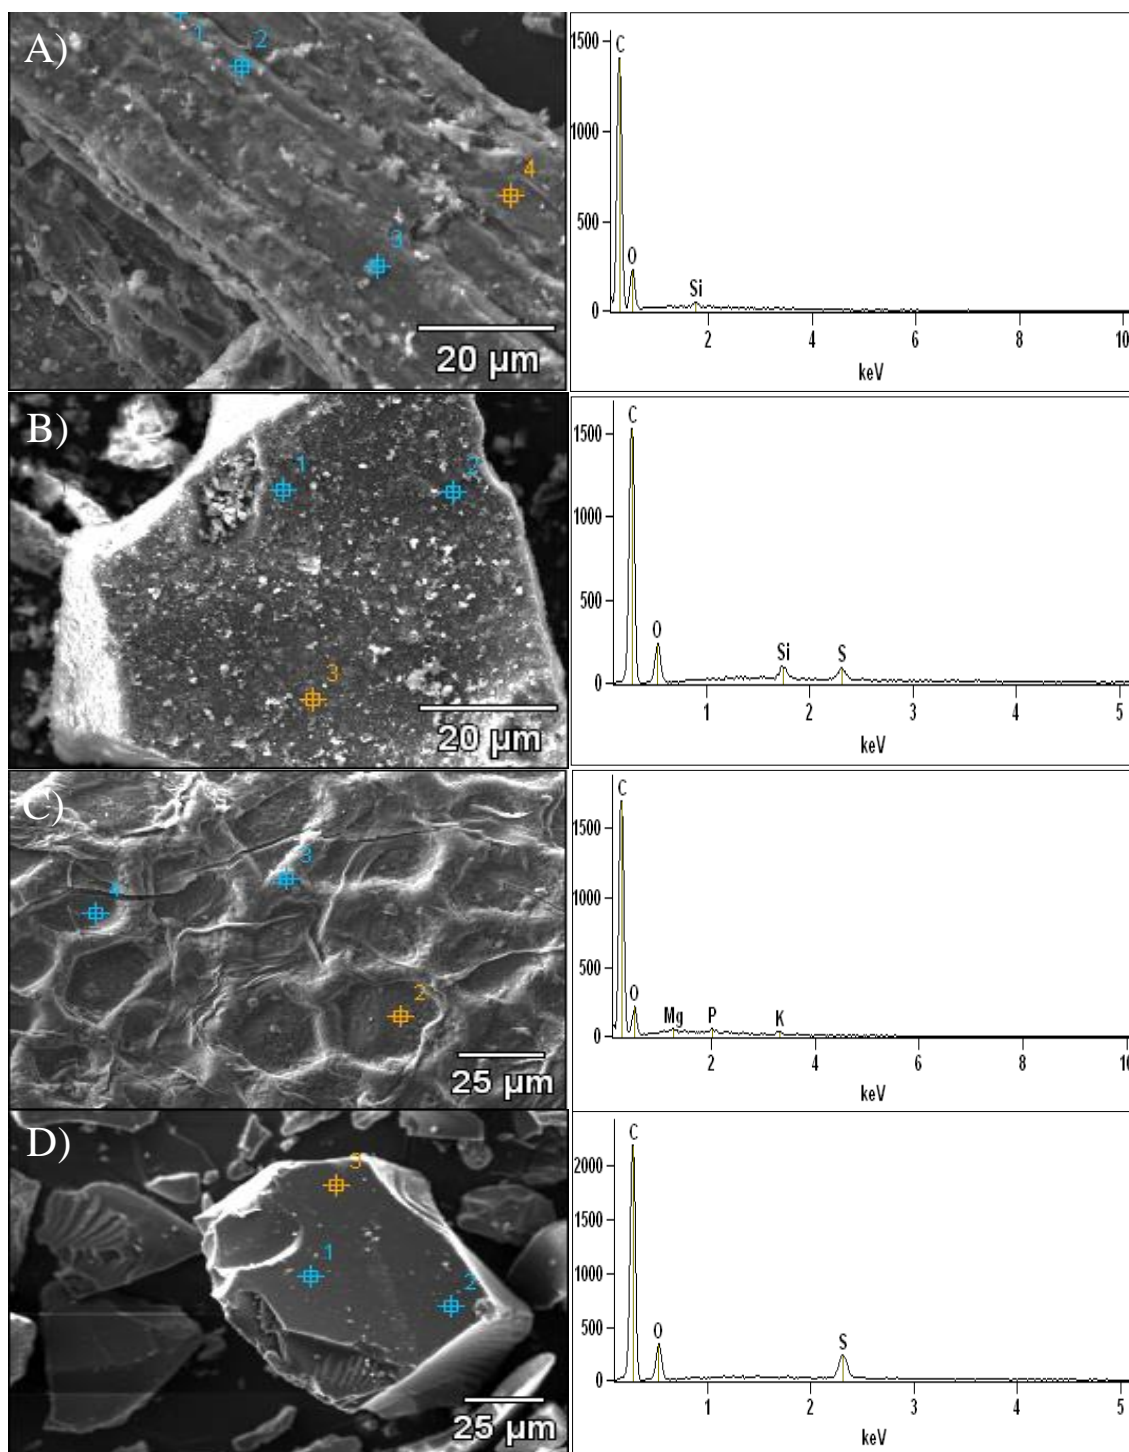

**Fig S1.** SEM image and EDX spectra of A) rice husk; B) CRH; C) tomato bagasse; and D) CTB.

## 2. TEM images

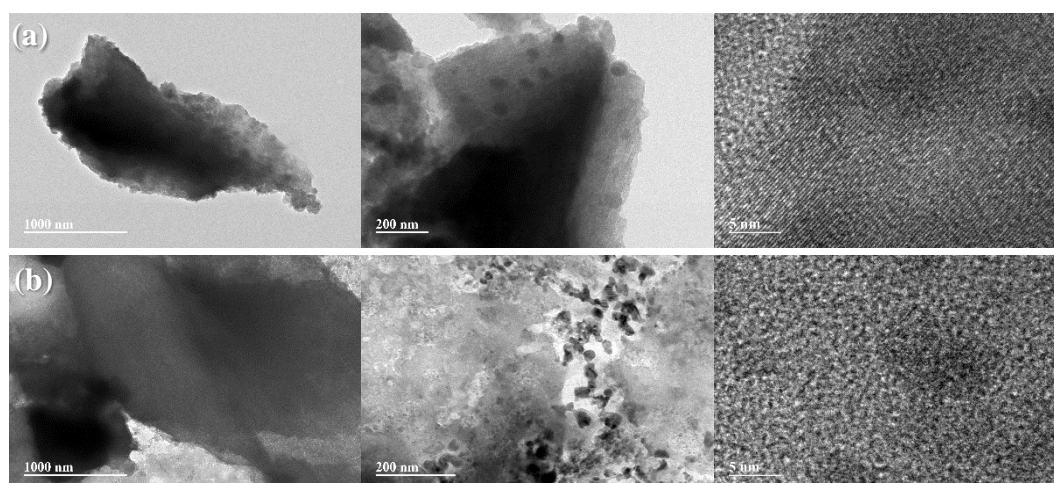

**Fig S2.** TEM images of (a) rice husk precursor and (b) CRH catalyst.

### 3. XRD analysis

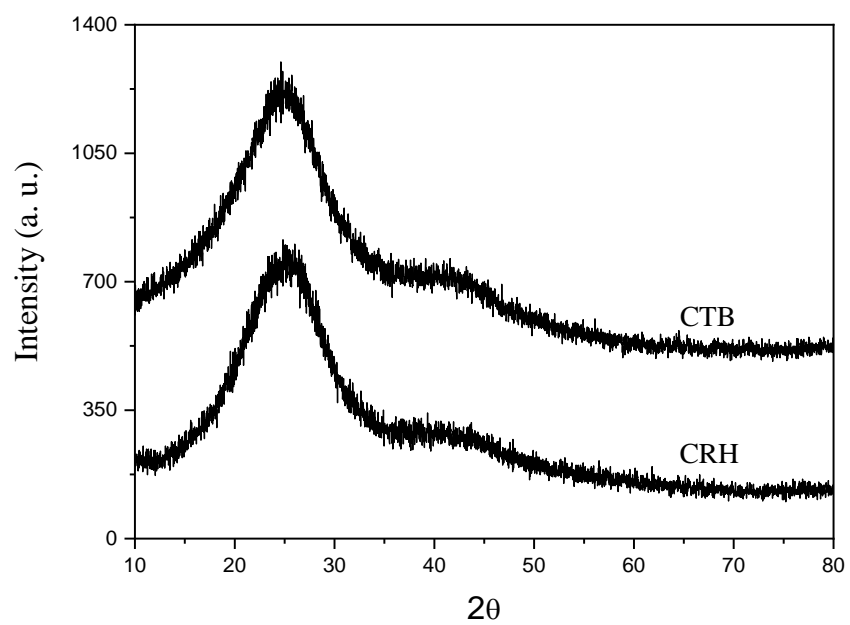

**Fig S3.** XRD diffractograms of CRH and CTB.

#### 4. Pore size distributions

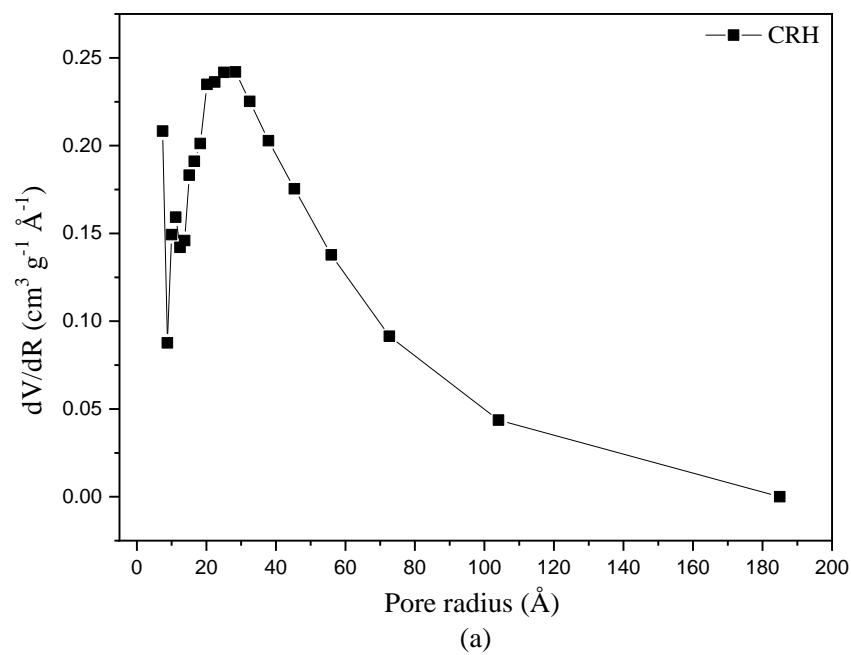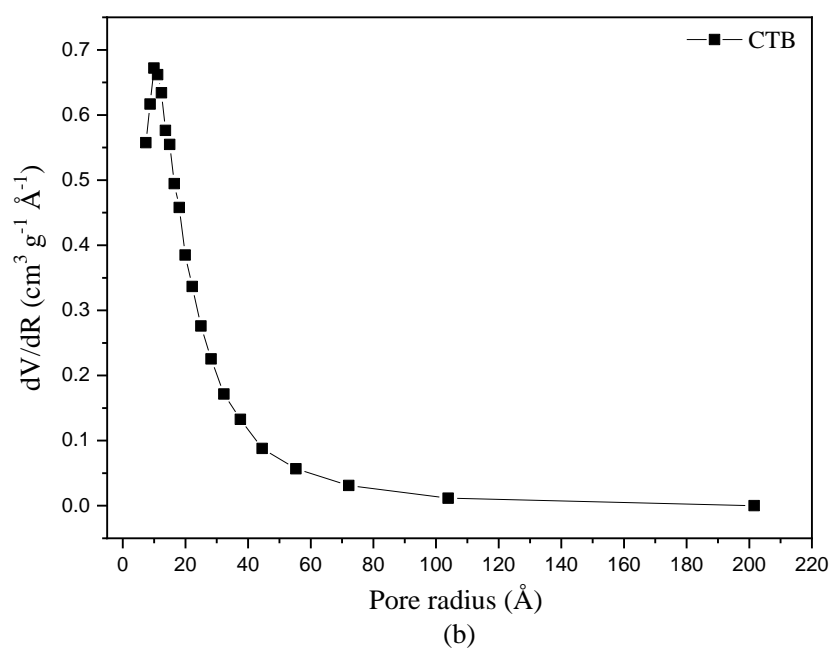

**Fig S4** Pore-size distributions of CRH and CTB.

## 5. Elementary composition by XPS analysis

**Table S1** Chemical composition of rice husk and catalyst of rice husk by XPS analysis

| <b>Sample</b> | <b>Elementary concentration (%)*</b> |             |             |              |             |
|---------------|--------------------------------------|-------------|-------------|--------------|-------------|
|               | <b>C 1s</b>                          | <b>O 1s</b> | <b>N 1s</b> | <b>Si 2p</b> | <b>S 2p</b> |
| Rice husk     | 69.5                                 | 23.9        | 1.5         | 4.9          | 0.3         |
| CRH           | 42.6                                 | 40.9        | 0.9         | 10.6         | 4.9         |

\* Values obtained from high resolution spectra with error of  $\pm 5\%$

## 6. NMR spectra

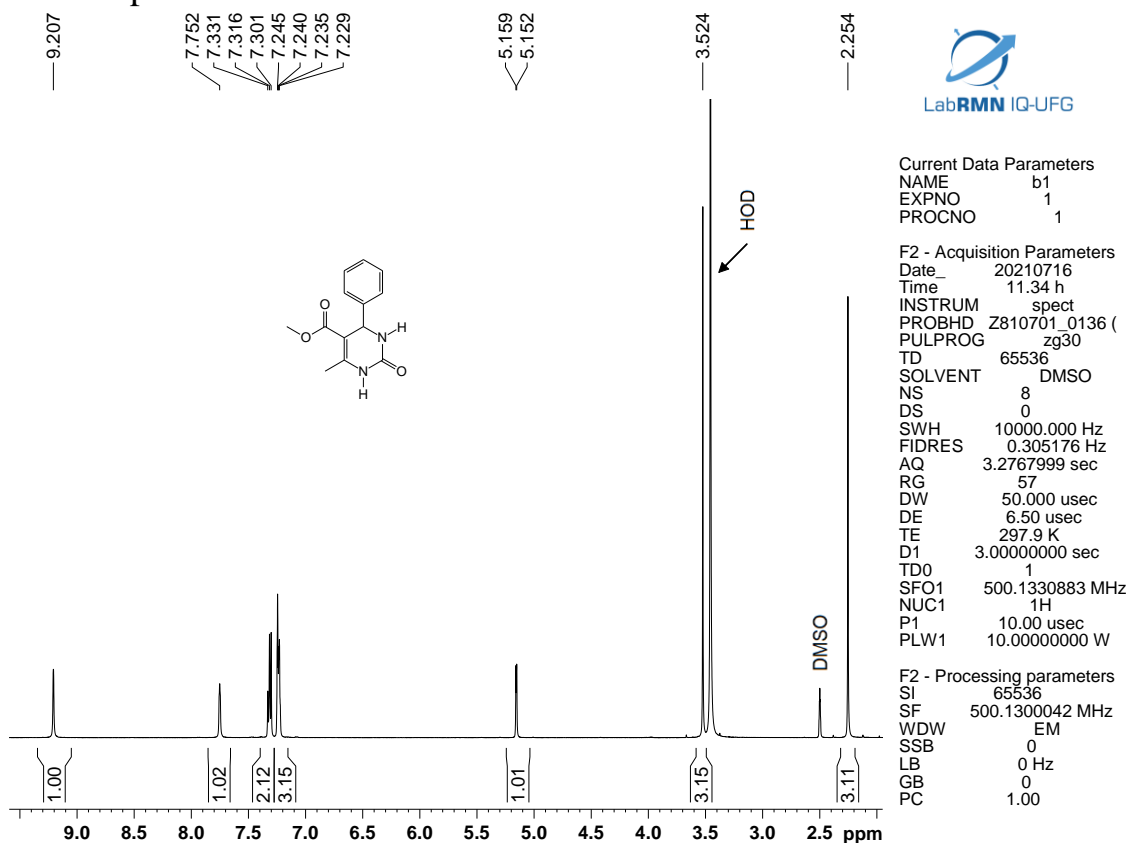

**Fig S5**  $^1\text{H}$ -NMR spectra of product B1 (*5-Methoxycarbonyl-4-phenyl-6-methyl-3,4-dihydropyrimidin-2(1-H)-one*).

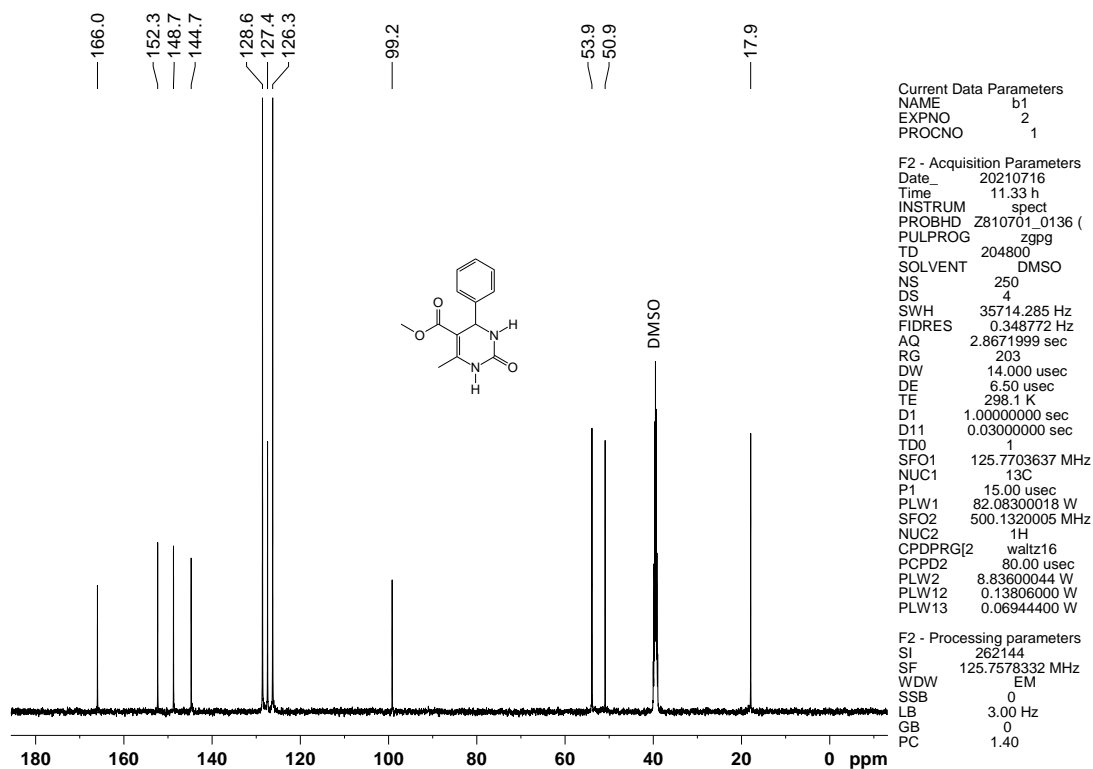

**Fig S6**  $^{13}\text{C}$ -NMR spectra of product B1 (*5-Methoxycarbonyl-4-phenyl-6-methyl-3,4-dihydropyrimidin-2(1-H)-one*).



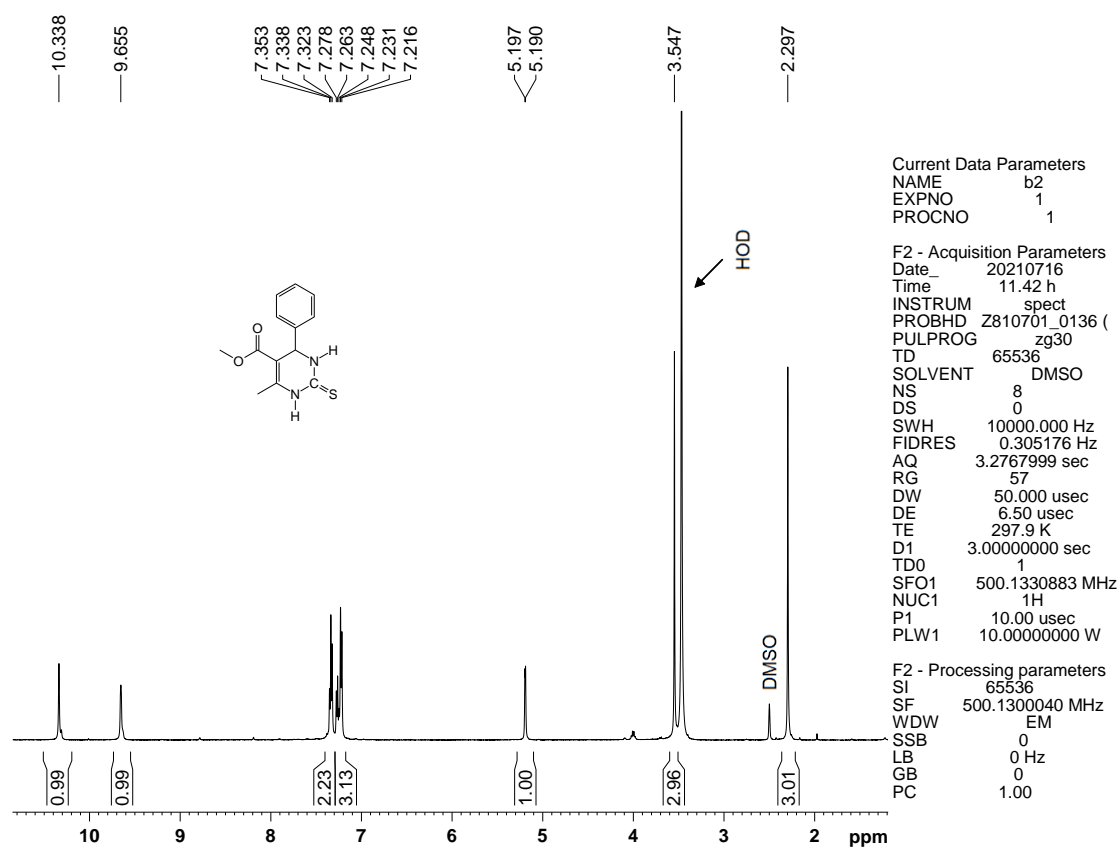

**Fig S7**  $^1\text{H}$ -NMR spectra of product B2 (5-Methoxycarbonyl-4-phenyl-6-methyl-3,4-dihydropyrimidin-2(1-H)-thione).

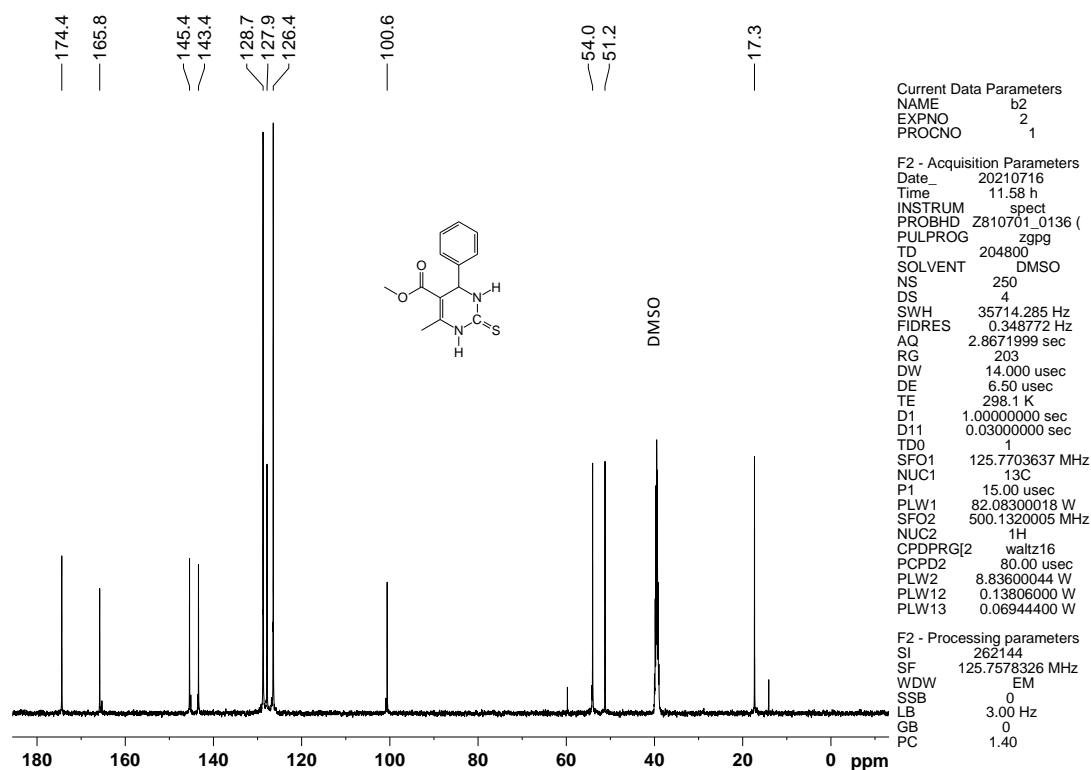

**Fig S8**  $^{13}\text{C}$ -NMR spectra of product B2 (5-Methoxycarbonyl-4-phenyl-6-methyl-3,4-dihydropyrimidin-2(1-H)-thione).

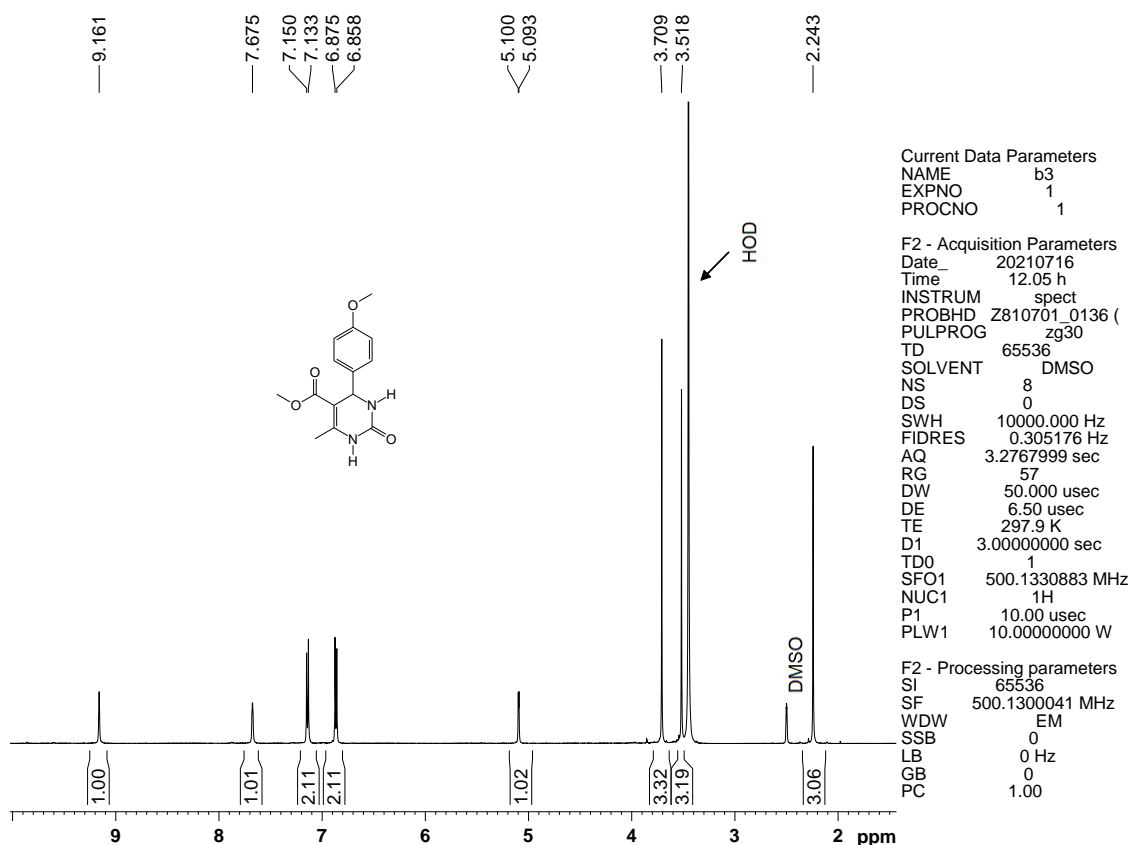

**Fig S9**  $^1\text{H}$ -NMR spectra of product B3 (5-Methoxycarbonyl-4-(4-methoxyphenyl)-6-methyl-3,4-dihydropyrimidin-2(1-H)-one).

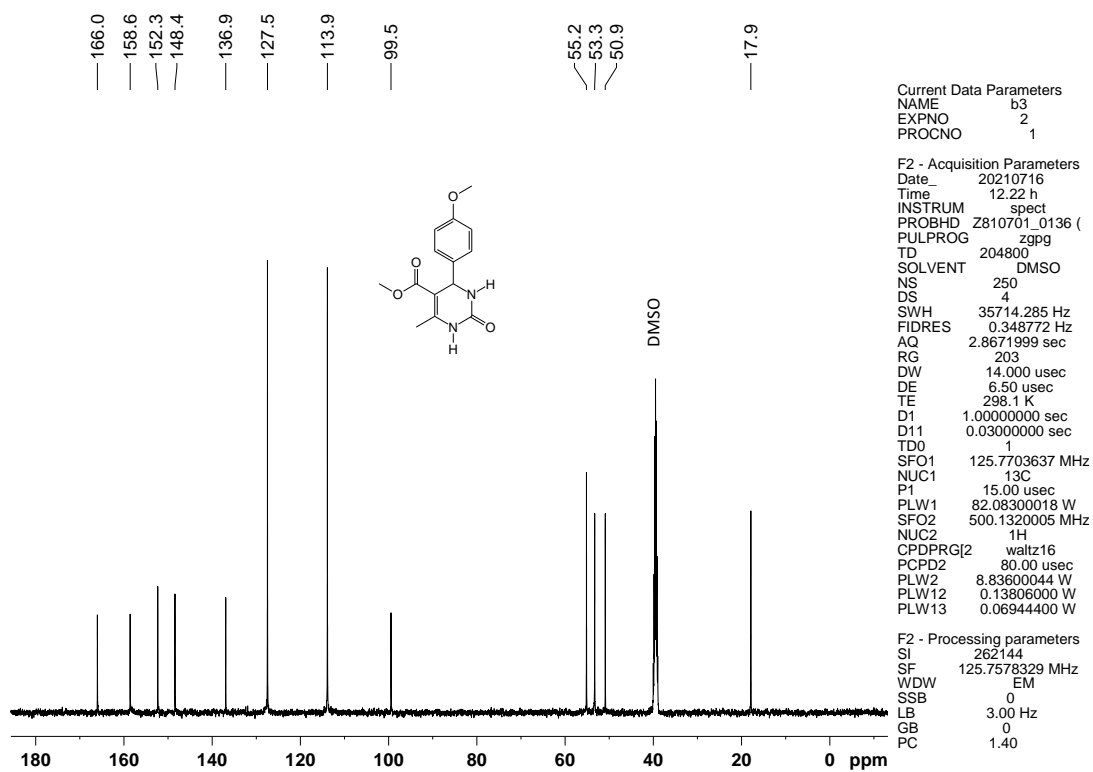

**Fig S10**  $^{13}\text{C}$ -NMR spectra of product B3 (5-Methoxycarbonyl-4-(4-methoxyphenyl)-6-methyl-3,4-dihydropyrimidin-2(1-H)-one).

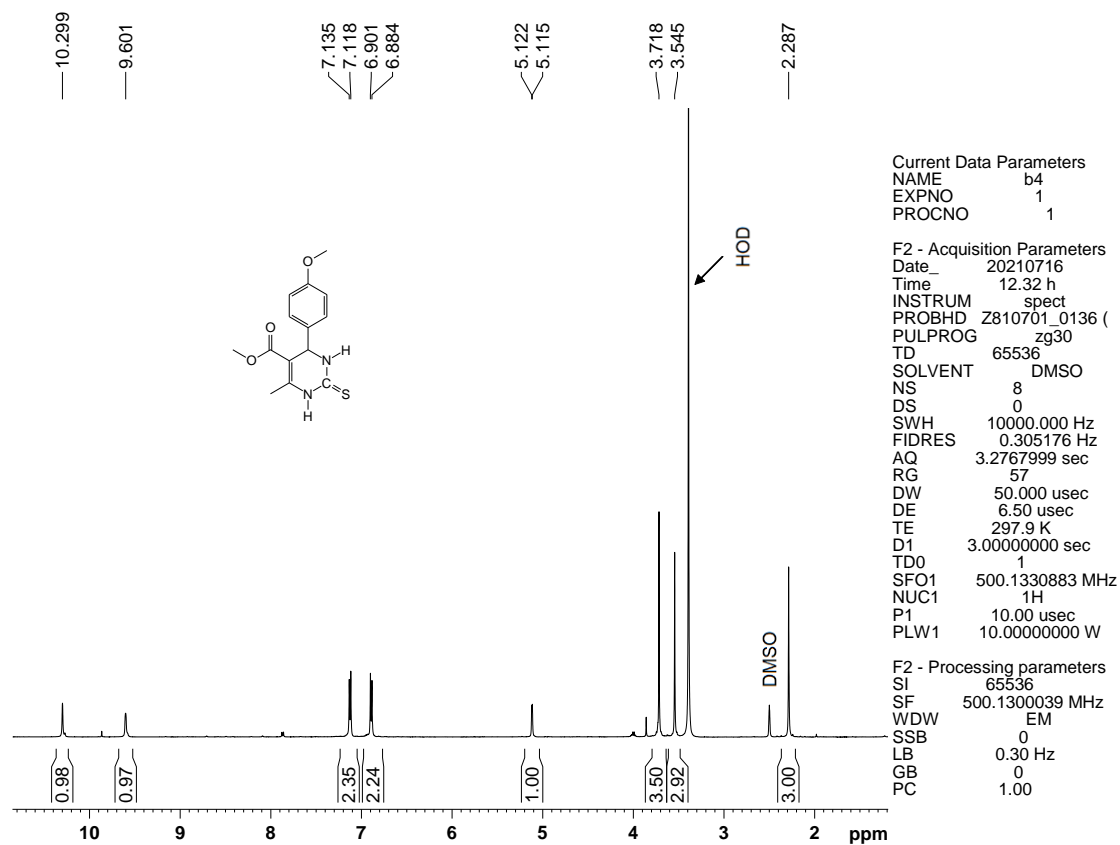

**Fig S11**  $^1\text{H}$ -NMR spectra of product B4 (5-Methoxycarbonyl-4-(4-methoxyphenyl)-6-methyl-3,4-dihydropyrimidin-2(1-H)-thione).

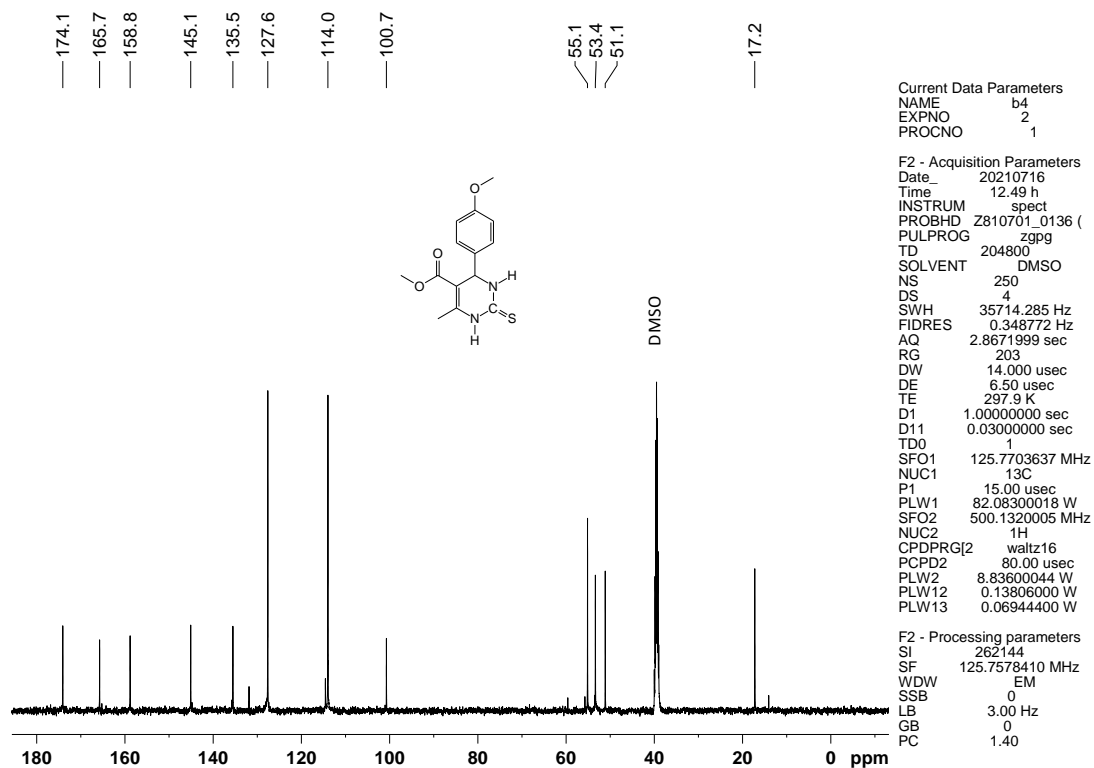

**Fig S12.**  $^{13}\text{C}$ -NMR spectra of product B4 (5-Methoxycarbonyl-4-(4-methoxyphenyl)-6-methyl-3,4-dihydropyrimidin-2(1-H)-thione).

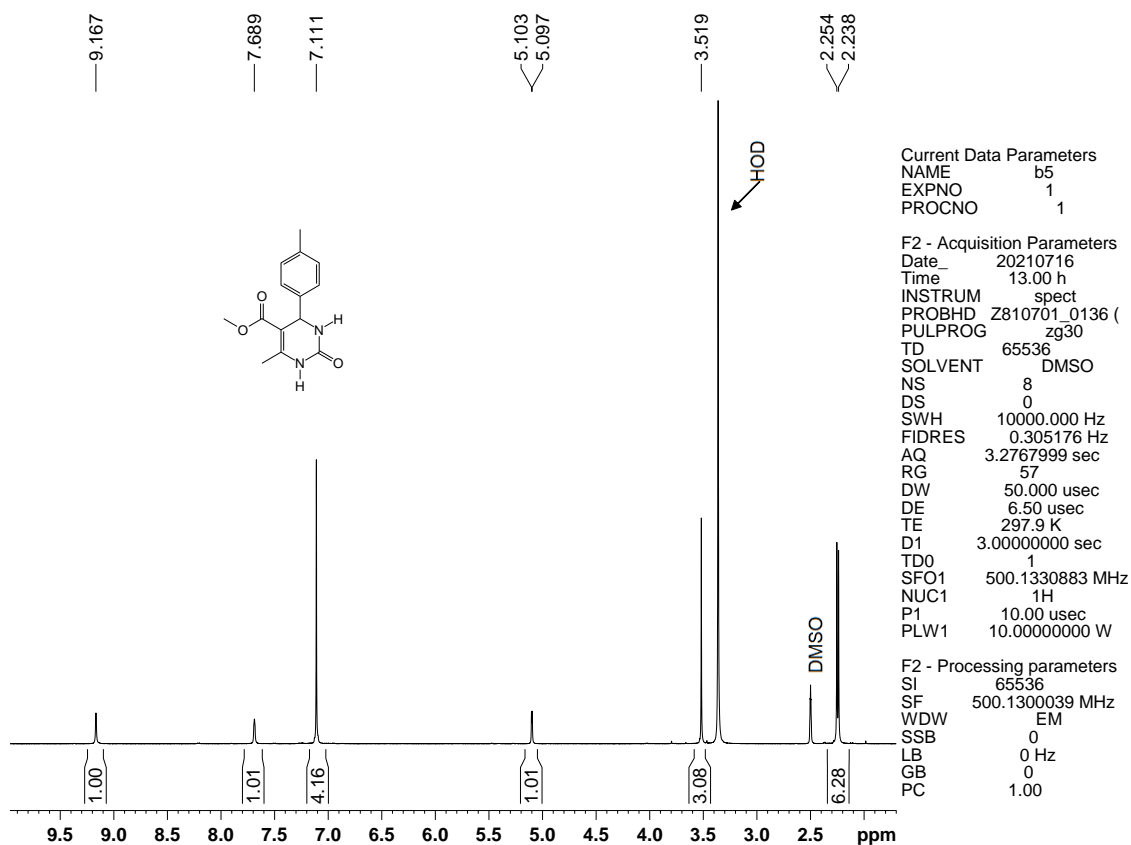

**Fig S13**  $^1\text{H}$ -NMR spectra of product B5 (*5-Methoxycarbonyl-4-(4-methylphenyl)-6-methyl-3,4-dihydropyrimidin-2(1-H)-one*).

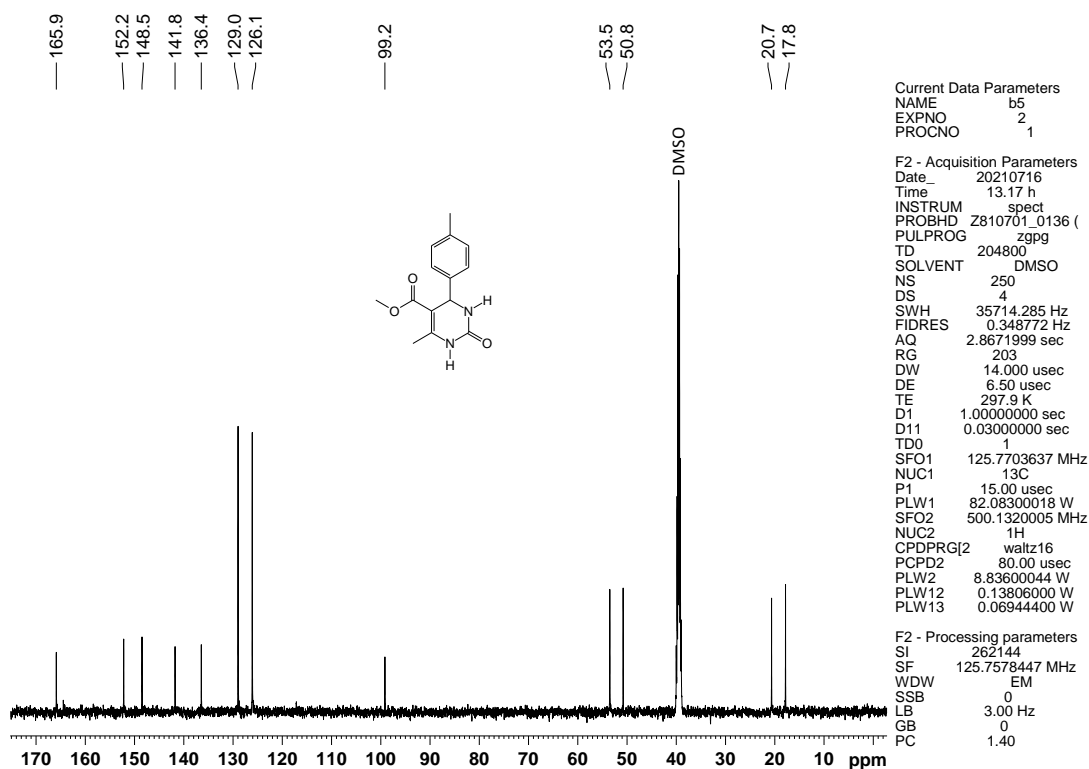

**Fig S14**  $^{13}\text{C}$ -NMR spectra of product B5 (*5-Methoxycarbonyl-4-(4-methylphenyl)-6-methyl-3,4-dihydropyrimidin-2(1-H)-one*).

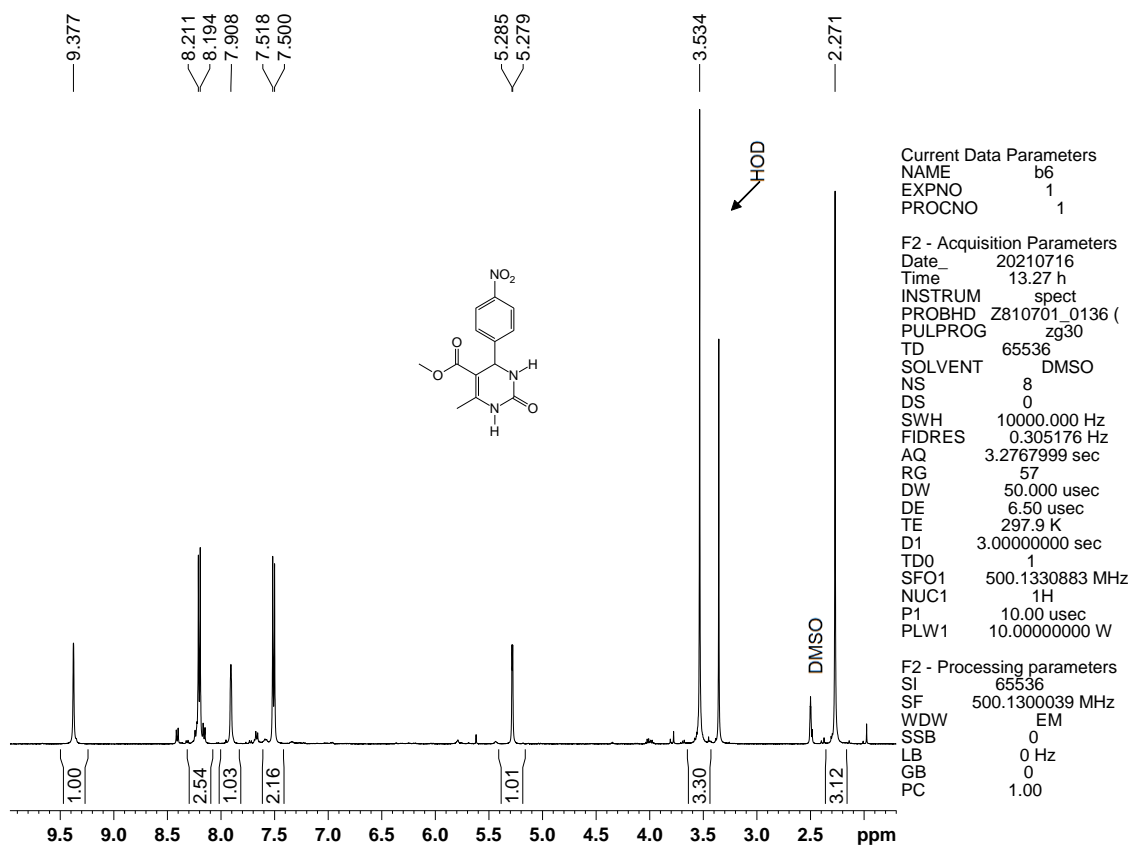

**Fig S15**  $^1\text{H-NMR}$  spectra of product B6 (5-Methoxycarbonyl-4-(4-nitrophenyl)-6-methyl-3,4-dihydropyrimidin-2(1-H)-one).

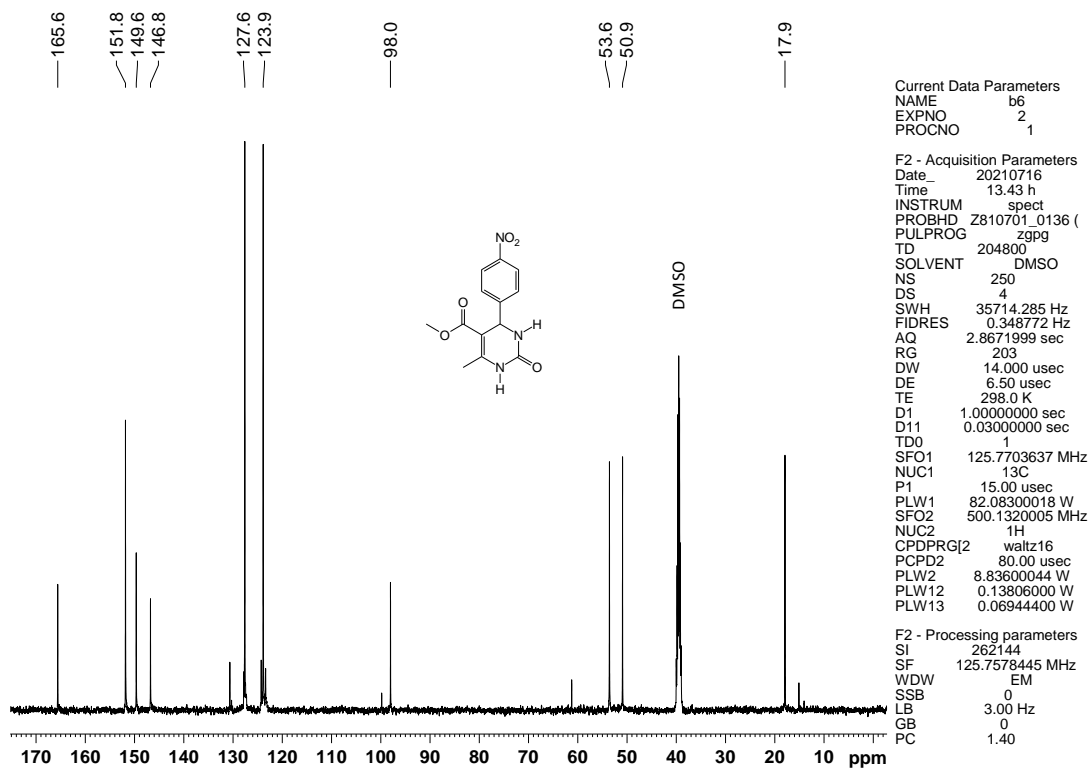

**Fig S16**  $^{13}\text{C-NMR}$  spectra of product B6 (5-Methoxycarbonyl-4-(4-nitrophenyl)-6-methyl-3,4-dihydropyrimidin-2(1-H)-one).

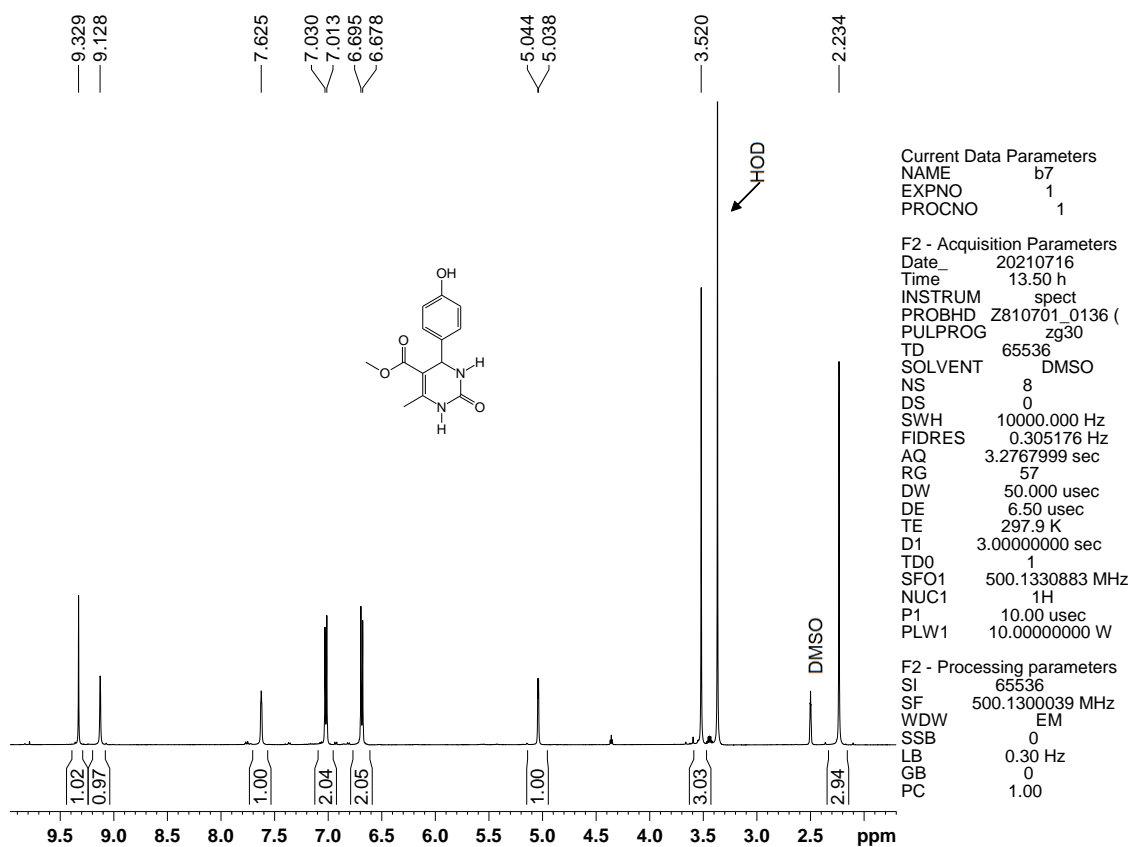

**Fig S17**  $^1\text{H}$ -NMR spectra of product B7 (5-Methoxycarbonyl-4-(4-hydroxyphenyl)-6-methyl-3,4-dihydropyrimidin-2(1-H)-one).

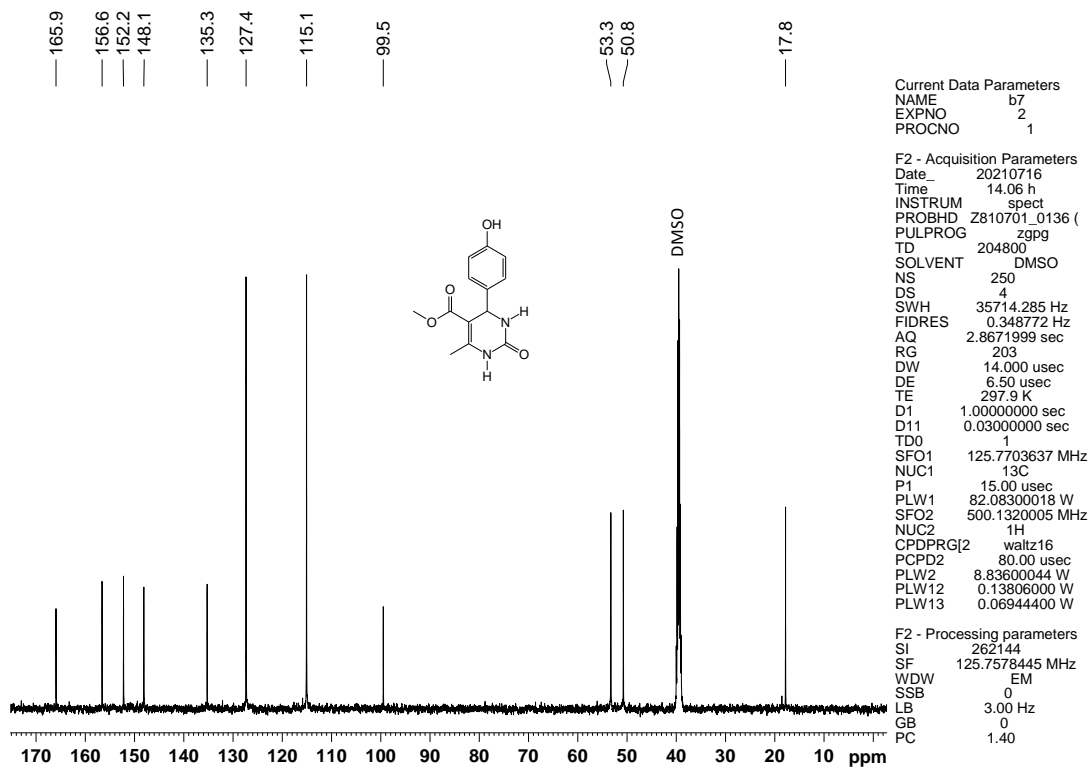

**Fig S18**  $^{13}\text{C}$ -NMR spectra of product B7 (5-Methoxycarbonyl-4-(4-hydroxyphenyl)-6-methyl-3,4-dihydropyrimidin-2(1-H)-one).

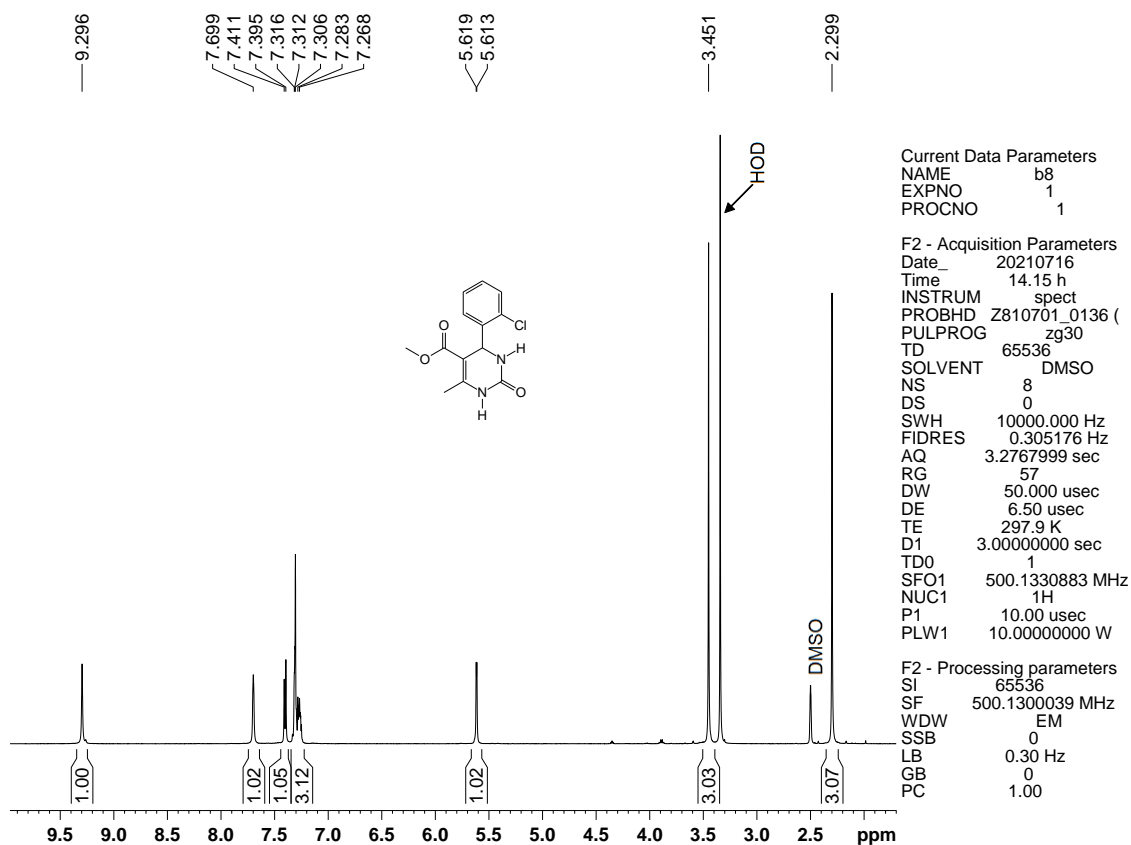

**Fig S19** <sup>1</sup>H-NMR spectra of product B8 (5-Methoxycarbonyl-4-(2-chlorophenyl)-6-methyl-3,4-dihydropyrimidin-2(1-H)-one).

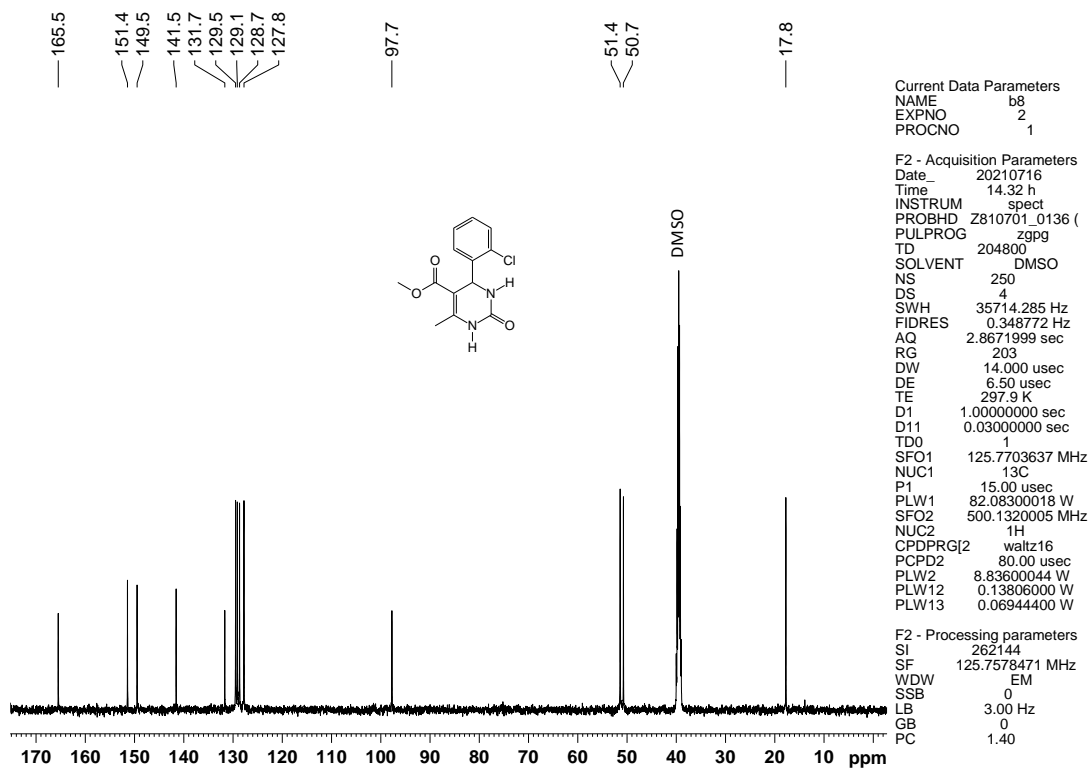

**Fig S20** <sup>13</sup>C-NMR spectra of product B8 (5-Methoxycarbonyl-4-(2-chlorophenyl)-6-methyl-3,4-dihydropyrimidin-2(1-H)-one).

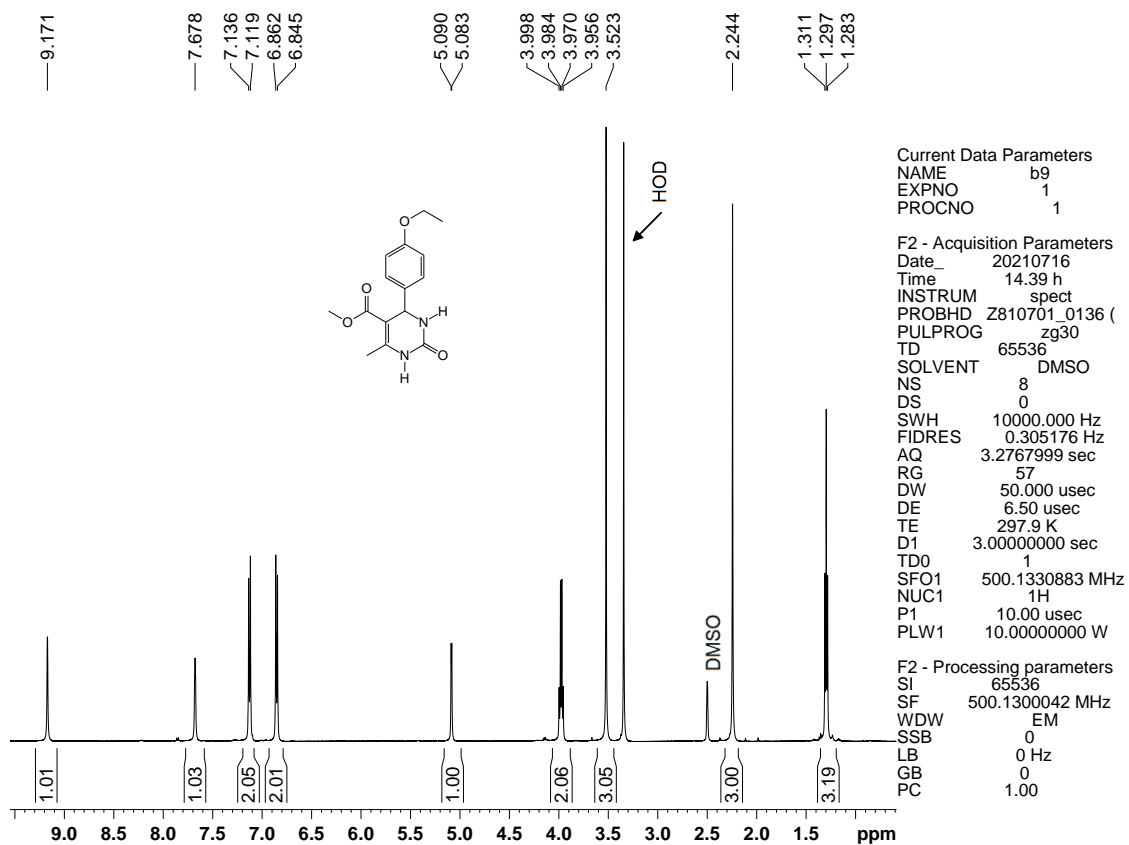

**Fig S21**  $^1\text{H}$ -NMR spectra of product B9 (5-Methoxycarbonyl-4-(4-ethoxyphenyl)-6-methyl-3,4-dihydropyrimidin-2(1-H)-one).

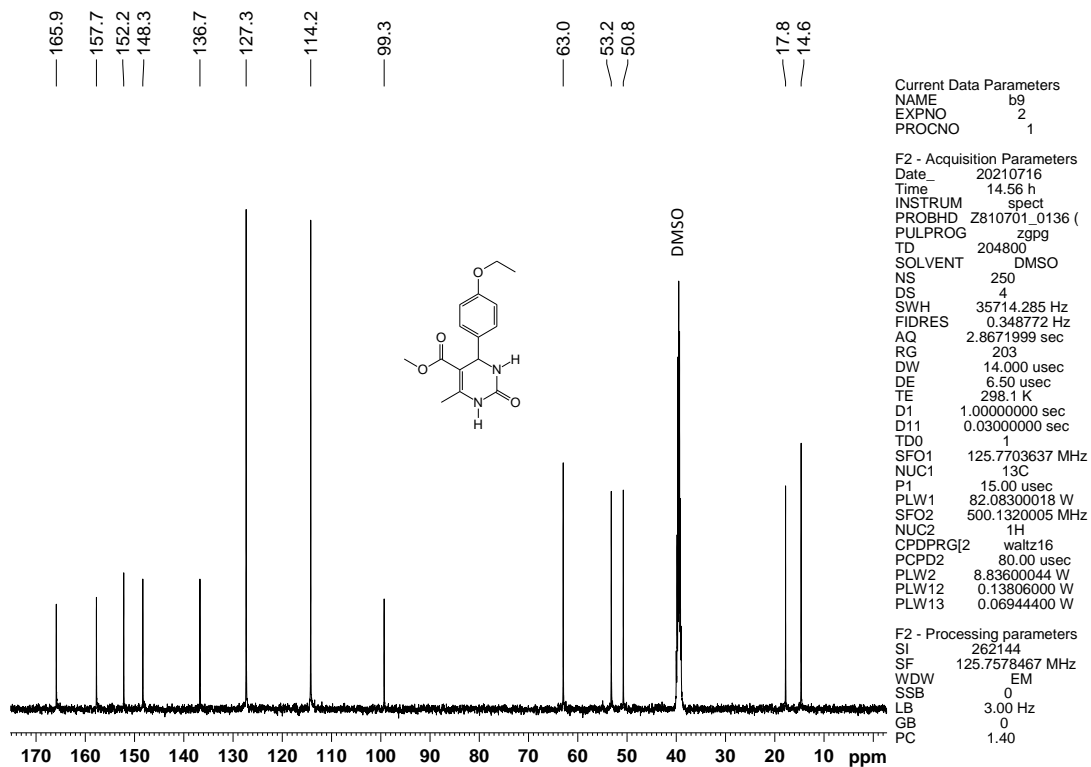

**Fig S22**  $^{13}\text{C}$ -NMR spectra of product B9 (5-Methoxycarbonyl-4-(4-ethoxyphenyl)-6-methyl-3,4-dihydropyrimidin-2(1-H)-one).



## 7. TEM images and SEM/EDX patterns of reused catalyst

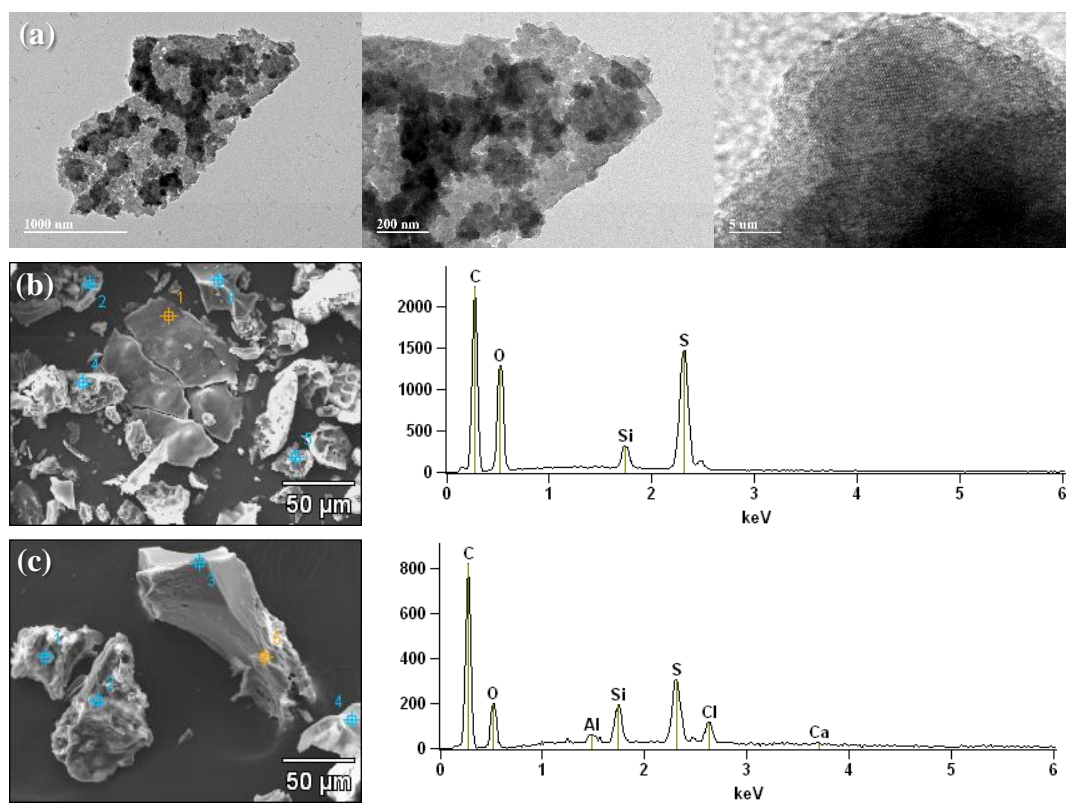

**Fig S23** TEM images of reused CRH catalyst (a); SEM-EDX patterns of (b) fresh and (c) reused catalysts.

## 8. Test of catalyst reuse

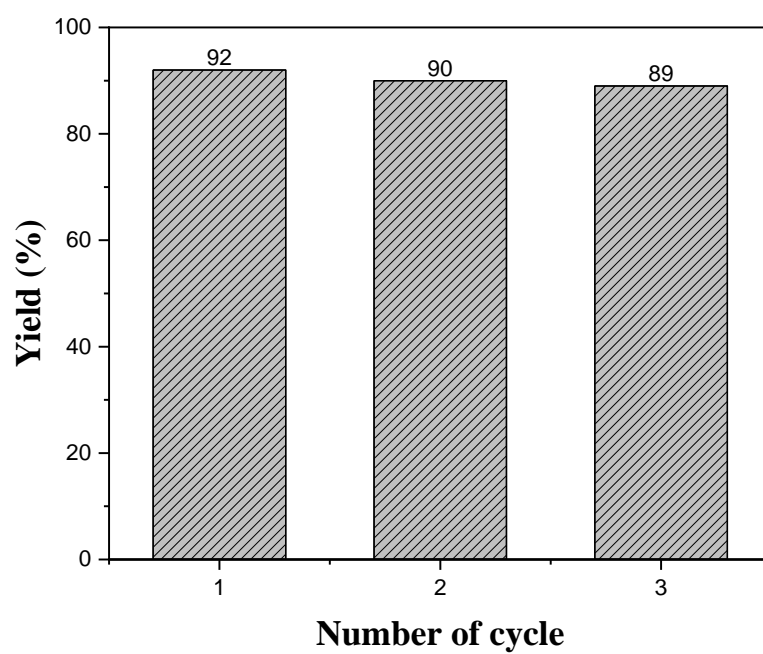

**Fig S24** Reusability of CRH catalyst for Biginelli reaction
